# Supplementary material for: AI-2 Induces Urease Expression Through Downregulation of Orphan Response Regulator HP1021 in Helicobacter pylori
Source: PubMed Central journal article supplement (PMC9010608; doi:10.3389/fmed.2022.790994), 2022-04-01
Supplement: Table_1.pdf [file Table_1.pdf]

**Supplementary Table 1. Primers used in this study**

| Primers                                                           | Sequence (5' to 3')                                     |
|-------------------------------------------------------------------|---------------------------------------------------------|
| Construction of <i>H. pylori</i> mutants and complemented mutants |                                                         |
| <i>hp1021</i> -up-F                                               | ctatagggcgaattgggtaccTATTATAACGAAGCTTTAGATA<br>GAGAAGCG |
| <i>hp1021</i> -up-R                                               | cgcccagtATCGTCTTCAATGATTAAGATTTTCATC                    |
| <i>hp1021-aphA3</i> -F                                            | attgaagacgatACTGGGCGGTTTTATGGACA                        |
| <i>hp1021-aphA3</i> -R                                            | ggtaagttatattccggcgAAATTAAAAATGAAGTTTTAGCA<br>CGTG      |
| <i>hp1021</i> -down-F                                             | CGCCGGAAATATAACTTACCGC                                  |
| <i>hp1021</i> -down-R                                             | caggaattcgatatcaagcttAGTTGAAATGAGAACCTCTATTG<br>GAA     |
| <i>fur</i> -up-F                                                  | ctatagggcgaattgggtaccTACAATCCTTACGGCCTCATAG<br>C        |
| <i>fur</i> -up-R                                                  | aaccgcccagtAATGGATTCCAAAGTTTCTAATCTTTT                  |
| <i>fur-aphA3</i> -F                                               | gaatccattACTGGGCGGTTTTATGGACA                           |
| <i>fur-aphA3</i> -R                                               | ctttacaccacacaaacaAAATTAAAAATGAAGTTTTAGCAC<br>GTG       |
| <i>fur</i> -down-F                                                | ttTGTTTGTGTGGTGTAAAGAATGCC                              |
| <i>fur</i> -down-R                                                | caggaattcgatatcaagcttTGATCGTTTATGAGCCGGTTAGT            |
| <i>hp0564</i> -up-F                                               | ctatagggcgaattgggtaccCCATTGCGTTCCCATAAGGG               |
| <i>hp0564</i> -up-R                                               | accgcccagtCTAATTCCATTAATAATTCCTTTTTTAGTT                |
| <i>hp0564-aphA3</i> -F                                            | atggaattagACTGGGCGGTTTTATGGACA                          |
| <i>hp0564-aphA3</i> -R                                            | gataccttaaagtaggcttaAAATTAAAAATGAAGTTTTAGCA<br>CGTG     |
| <i>hp0564</i> -down-F                                             | TAAGCCTACTTTAAGGTATCAGCTCTTAA                           |
| <i>hp0564</i> -down-R                                             | caggaattcgatatcaagcttGCGGCTATTTGATGCATATAGCT            |
| <i>hrcA</i> -up-F                                                 | ctatagggcgaattgggtaccTAAGGAGGGCGCGCGTAA                 |
| <i>hrcA</i> -up-R                                                 | accgcccagtTCTTGATGAAAGAACCCTCGCA                        |

---

|                                   |                                                         |
|-----------------------------------|---------------------------------------------------------|
| <i>hrcA-aphA3-F</i>               | ttcatcaagaACTGGGCGGTTTTATGGACA                          |
| <i>hrcA-aphA3-R</i>               | gtcaaaaaataaagggctgAAATTAAAAATGAAGTTTTAGCA<br>CGTG      |
| <i>hrcA-down-F</i>                | tCAGCCCTTTATTTTTTGACATTTTAG                             |
| <i>hrcA-down-R</i>                | caggaattcgatatcaagcttGATTTTCCCGTTTTCTTTTTCTTC           |
| <i>rpoN-up-F</i>                  | ctatagggcgaattgggtaccTAAAAAAACCAAAATCGTTTCA<br>GACG     |
| <i>rpoN-up-R</i>                  | aaaccgccagtGTAAGATCGCCATGTCTATACCTTAAA                  |
| <i>rpoN-aphA3-F</i>               | gatcttacACTGGGCGGTTTTATGGACA                            |
| <i>rpoN-aphA3-R</i>               | cgcgcatcaaatagagccttAAATTAAAAATGAAGTTTTAGCA<br>CGTG     |
| <i>rpoN-down-F</i>                | AAGGCTCTATTTGATGCGCG                                    |
| <i>rpoN-down-R</i>                | caggaattcgatatcaagcttTGGATTTAACCATTTCGCATGG             |
| <i>hp1021-up-F1</i>               | ctatagggcgaattgggtaccTATTATAACGAAGCTTTAGATA<br>GAGAAGCG |
| <i>hp1021-up-R1</i>               | tggcggaATCGTCTTCAATGATTAAGATTTTCATC                     |
| <i>hp1021-CAT-F</i>               | cattgaagacgatTCCGCCATATTGTGTTGAAACA                     |
| <i>hp1021-CAT-R</i>               | aagttatattccggcgGGGCACCAATAACTGCCTTAAA                  |
| <i>hp1021-down-F1</i>             | cccCGCCGGAAATATAACTTACCGC                               |
| <i>hp1021-down-R1</i>             | caggaattcgatatcaagcttAGTTGAAATGAGAACCTCTATTG<br>GAA     |
| <i>hp1021<sup>C</sup>-up-F</i>    | ctatagggcgaattgggtaccTTCAGTGAAATATTACTTGCAA<br>GATCC    |
| <i>hp1021<sup>C</sup>-up-R</i>    | ggTAATGCAGTATTATGGGGTTAGGGG                             |
| <i>hp1021<sup>C</sup>-PureA-F</i> | ccccataactgcattaCCATTATCACTCCAATTTTAATTCT<br>CA         |
| <i>hp1021<sup>C</sup>-PureA-R</i> | agatttcatCTTATTCTCCTATTCTTAAAGTGTTTTTCC                 |
| <i>hp1021<sup>C</sup>-F</i>       | ggagaataagATGAAAATCTTAATCATTGAAGACGATT                  |
| <i>hp1021<sup>C</sup>-R</i>       | tatggcggaTTATTTGCGCGGTAAGTTATATTTT                      |

---

---

|                                   |                                                    |
|-----------------------------------|----------------------------------------------------|
| <i>hp1021<sup>C</sup></i> -CAT-F  | cgcgcaaataaTCCGCCATATTGTGTTGAAACA                  |
| <i>hp1021<sup>C</sup></i> -CAT-R  | tagcttcttgGGGCACCAATAACTGCCTTAAAG                  |
| <i>hp1021<sup>C</sup></i> -down-F | attggtgccCAAGAAGCTATCGTTTGCTAAACAA                 |
| <i>hp1021<sup>C</sup></i> -down-R | caggaattcgatatcaagcttAAATACGCTAAAAATAAGCAA<br>TGGA |

---

qPCR

---

|                       |                          |
|-----------------------|--------------------------|
| 16s rRNA-qPCR-F       | CTCATTGCGAAGGCGACCT      |
| 16s rRNA-qPCR-R       | TCTAATCCTGTTTGCTCCCCA    |
| <i>ureA</i> -qPCR-F   | TTTCGTTGTCTGCTTGCCTATC   |
| <i>ureA</i> -qPCR-R   | CGGCTCACACTTCCATTTCTTT   |
| <i>ureB</i> -qPCR-F   | TAACTTCACCCACACGACCCAT   |
| <i>ureB</i> -qPCR-R   | CCGCTTCCACTAACCCCACTAT   |
| <i>hp1021</i> -qPCR-F | CAACCACACGACTTTCCTTTCCAT |
| <i>hp1021</i> -qPCR-R | GTTATATTTCCGGCGTTTTTCCCA |
| <i>fliA</i> -qPCR-F   | AAAAAACTGAAACAAGCGAAAAA  |
| <i>fliA</i> -qPCR-R   | CACGGCTGGTAAATACTGAATAG  |
| <i>arsR</i> -qPCR-F   | ATTATGGGGCTGATGATTACCTC  |
| <i>arsR</i> -qPCR-R   | GGCTCACTCACTTCTTCTTTTTT  |
| <i>hp0222</i> -qPCR-F | ATGGAAAAGACAGAAAACACAGA  |
| <i>hp0222</i> -qPCR-R | AAATACAAGCTTACAGCACGAGT  |
| <i>flgR</i> -qPCR-F   | AGCCATTGATTCCATTCGTTTAG  |
| <i>flgR</i> -qPCR-R   | GCTGTGTTTGTGTGGTTTTTTTA  |
| <i>hup</i> -qPCR-F    | AAGCGTGGAGTTGATCGGTTTTG  |
| <i>hup</i> -qPCR-R    | CACCCGTTTGTCTTCAGTTTTAT  |
| <i>hspR</i> -qPCR-F   | GATTATGATGAACCGCTTTATTT  |
| <i>hspR</i> -qPCR-R   | TCGTTTTGATTTTGTCCATGTCT  |
| <i>hsrA</i> -qPCR-F   | GGATAACCCTACAAGCGAGGAAG  |
| <i>hsrA</i> -qPCR-R   | TCAATCACATTAGAACCCCAAAA  |
| <i>cheY</i> -qPCR-F   | GGTAAGGCTGAGGTCATTACGGC  |

---

---

|                       |                          |
|-----------------------|--------------------------|
| <i>cheY</i> -qPCR-R   | TTTTTCTTTCAAACCTTGGGGGG  |
| <i>nikR</i> -qPCR-F   | AATCATCCGCTTTTCGGTTTCTT  |
| <i>nikR</i> -qPCR-R   | TCGTCATTAGGGTTGTCTTCTGC  |
| <i>crdR</i> -qPCR-F   | TTAGGAGCGAGCGATTATTTGA   |
| <i>crdR</i> -qPCR-R   | GATCTCTTTTTTGCCCCTGACAC  |
| <i>rpoD</i> -qPCR-F   | AGCGATTGCGTTTCTTATGAGTC  |
| <i>rpoD</i> -qPCR-R   | TTTTGCTTTTCTTCGGTTTTTTT  |
| <i>rpoN</i> -qPCR-F   | AAGCTCAAATCATTCCCCCTCTCT |
| <i>rpoN</i> -qPCR-R   | AAACTTCGCTCTTACCCCTAAAA  |
| <i>hrcA</i> -qPCR-F   | GTATTCCAACACACAAATCACACG |
| <i>hrcA</i> -qPCR-R   | GGCTCTATAAAATGCAAACCCTTA |
| <i>hp0564</i> -qPCR-F | AAACGCAATTTTTCAGTGACTTTT |
| <i>hp0564</i> -qPCR-R | GAATCTTGGTTAGTGCCTTTTTTG |
| <i>fur</i> -qPCR-F    | GAACACCATGATCACATCATTGT  |
| <i>fur</i> -qPCR-R    | TCACTCTCTTGGCATTCTTTACAC |
| <i>hp0631</i> -qPCR-F | ACTCCGCTTCAATTCACACACCT  |
| <i>hp0631</i> -qPCR-R | TATCCGCTACTTTATCAGCCCCT  |
| <i>hp0632</i> -qPCR-F | ATTAAAAACGGCGTGGTGGAAAA  |
| <i>hp0632</i> -qPCR-R | GCATGGGTCAAAGAATGGATAG   |
| <i>hp0635</i> -qPCR-F | AACCCCAATTCTATCGTTTTGT   |
| <i>hp0635</i> -qPCR-R | TGTAGCATTCTGGAGGCTTTTTTC |
| <i>hp0389</i> -qPCR-F | AAAAATTGAAATCATTCAAACGA  |
| <i>hp0389</i> -qPCR-R | CACACATCCACCACTAAAAGCGG  |
| <i>flgL</i> -qPCR-F   | TTGGATAATAATGGGGCTTTTTT  |
| <i>flgL</i> -qPCR-R   | TTGTTGGTAGATGGCTGGGTCAG  |
| <i>fliS</i> -qPCR-F   | GAAAAAGGGGGGGAAGTGGCGGT  |
| <i>fliS</i> -qPCR-R   | AGGCGAGTTCATCTGAATGGATT  |
| <i>hp1120</i> -qPCR-F | GCGAGAGTCCTTGTTTGTTTTGA  |
| <i>hp1120</i> -qPCR-R | GGGAATGATTTGTTGGATGAGCG  |

---

---

|                       |                         |
|-----------------------|-------------------------|
| <i>hp0755</i> -qPCR-F | ACGCTTGAACCCTAAACACAT   |
| <i>hp0755</i> -qPCR-R | CGTAACCGCATTAAAACTCCC   |
| <i>hp1000</i> -qPCR-F | AGCCAATGAAAAAGGAGGGAG   |
| <i>hp1000</i> -qPCR-R | CTGTGCGATTAAAGAGCGTGA   |
| <i>pdxA</i> -qPCR-F   | TATTGATGCCCCCTTACCCTT   |
| <i>pdxA</i> -qPCR-R   | TCCACCTCTTTACTATCCGCT   |
| <i>hp1582</i> -qPCR-F | TAAGCCCCTTGCCTATCAACA   |
| <i>hp1582</i> -qPCR-R | ACAATCCAATCCCCCCTCTGT   |
| <i>pgi</i> -qPCR-F    | ACCTTAACCAACGCCCTAACC   |
| <i>pgi</i> -qPCR-R    | CCCCCTACAAAATCCCAAAA    |
| <i>hp0939</i> -qPCR-F | CGCTCTTGGGGTCTATATGGA   |
| <i>hp0939</i> -qPCR-R | AAAGGCTGATGAAAGTGTTAC   |
| <i>hp1229</i> -qPCR-F | GATCGGCAGAGACGGCAAAC    |
| <i>hp1229</i> -qPCR-R | GATACTCGCCACCCCAGAATG   |
| <i>hp1036</i> -qPCR-F | CTACGATCATCCTTAAACATC   |
| <i>hp1036</i> -qPCR-R | TAACACCGAATCCCTTTCCTC   |
| <i>hp0806</i> -qPCR-F | AGTTTTGGGGAGTTGCTCTTAT  |
| <i>hp0806</i> -qPCR-R | GAATGGTTTTTGTGGATCGTGT  |
| <i>trpC</i> -qPCR-F   | GGATTTTGTGGGCGTGTGTTGTG |
| <i>trpC</i> -qPCR-R   | ATTGAGCGATTTCTTTTTGCGA  |
| <i>hp1589</i> -qPCR-F | TTTTTTTAGAGATGAAGGGGTC  |
| <i>hp1589</i> -qPCR-R | TCAATCAAAGTTGTGTCAGACT  |
| <i>hp1283</i> -qPCR-F | TATGGCGTGTTGAATCTCGGAG  |
| <i>hp1283</i> -qPCR-R | AAAGAAATGGCATTGTTGTGGC  |
| <i>hp0880</i> -qPCR-F | ATAGTCTCATATCAGCTTGGCG  |
| <i>hp0880</i> -qPCR-R | AAATCTTTTTGAATTTTTTCCA  |
| <i>hp0483</i> -qPCR-F | TCCCTAAACCCATAAAAACGC   |
| <i>hp0483</i> -qPCR-R | CGCACAAATTCCAAAAAACAT   |
| <i>infB</i> -qPCR-F   | GAAGGGAGGGATAGAGATTGTC  |

---

---

|                       |                          |
|-----------------------|--------------------------|
| <i>infB</i> -qPCR-R   | CTTTTTTGGATTTCTTGGAGTT   |
| <i>hp0415</i> -qPCR-F | TTATTATTGTGGTGGGTATTGG   |
| <i>hp0415</i> -qPCR-R | AGGGTTTTTTTTTGTAAGTTTCA  |
| <i>hp1010</i> -qPCR-F | TGAAATGAATCACCAACAAGAA   |
| <i>hp1010</i> -qPCR-R | TCCCCACGATAGAATACACCCT   |
| <i>hp0454</i> -qPCR-F | TCATTATCAATCGCGCCATTCC   |
| <i>hp0454</i> -qPCR-R | CCCCAAGCTTTTTGCCAACCTCT  |
| <i>hp0264</i> -qPCR-F | ATTCCAAGGCATTCTCATTCAA   |
| <i>hp0264</i> -qPCR-R | CCATATTCGCCAAAAGATACACA  |
| <i>hp0250</i> -qPCR-F | CAGCCTGAACCCCTTGCATAAAA  |
| <i>hp0250</i> -qPCR-R | GCCCATAGCGATACACACCCTTT  |
| <i>hp0291</i> -qPCR-F | CTCATCAAACAAGAAAGCCCCAT  |
| <i>hp0291</i> -qPCR-R | AACCTCTGTATAAAAACCCGTAA  |
| <i>flhB</i> -qPCR-F   | GGCTCATTTCTTCGCTTTTATTT  |
| <i>flhB</i> -qPCR-R   | CTTGCTGTTTGTATTTCGTCCTTA |
| <i>hp1231</i> -qPCR-F | AAAGGTGATCAAACTTTCAACA   |
| <i>hp1231</i> -qPCR-R | CTATACCATAACTAGGAGCGGCG  |
| <i>hp0614</i> -qPCR-F | AAAAACAAGCAAAGAGCGAAGAA  |
| <i>hp0614</i> -qPCR-R | AAAGAGGAGCGAGCGGTTAGAAA  |
| <i>flhA</i> -qPCR-F   | GAGGGTTTTTAGTGGGCGTGTT   |
| <i>flhA</i> -qPCR-R   | TCTTCTTCATTTTGCCTGGTGC   |
| <i>hp0792</i> -qPCR-F | CTATCCAAGAAGCCAAACAGCG   |
| <i>hp0792</i> -qPCR-R | TAACTCCCCAAAAGCAAACCAC   |
| <i>thiE</i> -qPCR-F   | TTCCCACACCATCTAAAAAAGA   |
| <i>thiE</i> -qPCR-R   | TAATGACTGCGATACCCCCATA   |
| <i>hemE</i> -qPCR-F   | CGTTAATCGGTTTTTGC GGATC  |
| <i>hemE</i> -qPCR-R   | CGCTATAAAGCATTTTCTTGCT   |
| <i>hp0653</i> -qPCR-F | TCATGCGACTTTCAATTTCTTG   |
| <i>hp0653</i> -qPCR-R | GATTTCTGCTTTTAGCGATCC    |

---

---

|                       |                         |
|-----------------------|-------------------------|
| <i>frdB</i> -qPCR-F   | CGGGTGTGTGATCGCTTCTTGC  |
| <i>frdB</i> -qPCR-R   | GTTTCTTTCATCGTGGCTGTCA  |
| <i>trmE</i> -qPCR-F   | AGACATTCCTAGCGATTTTTTA  |
| <i>trmE</i> -qPCR-R   | CTTTATTCCTTTGTTTTTGAGC  |
| <i>atpC</i> -qPCR-F   | TAGTGTGGTAGTTCCTGAGGGG  |
| <i>atpC</i> -qPCR-R   | AATTGATCGCAATGTGTTCTTT  |
| <i>hp1461</i> -qPCR-F | ATCCATTTTATTGGGCGTTTGC  |
| <i>hp1461</i> -qPCR-R | CGGAGGTCATGATTTTCGCTGTT |
| <i>hp0133</i> -qPCR-F | GTGAAAGCAAGGGAACAAAATA  |
| <i>hp0133</i> -qPCR-R | ATGCCCAAAAAAAGATGAAAAA  |
| <i>hp0389</i> -qPCR-F | CCAAAGCGACTGCCCTAAGCGA  |
| <i>hp0389</i> -qPCR-R | ATTCCAACCAGAGCCAAACAAA  |
| <i>hp0096</i> -qPCR-F | ACAGAATCCGTAGCCCAGCACA  |
| <i>hp0096</i> -qPCR-R | TCCCTAAACCAATAACCCCCCA  |
| <i>hp0013</i> -qPCR-F | CAAGGAATGAAGAAGAAAACCA  |
| <i>hp0013</i> -qPCR-R | TTATCCACCAAACCTCAAAGGGC |
| <i>hp1132</i> -qPCR-F | CCTCAAATGATCGGTGAGAAAC  |
| <i>hp1132</i> -qPCR-R | AAAGAACGGCTGGGATAAAAAC  |
| <i>hp1295</i> -qPCR-F | CGACCTTTAACAACACCAACAT  |
| <i>hp1295</i> -qPCR-R | CTTAGAGCGCTTTCTACAGCCT  |
| <i>hp0633</i> -qPCR-F | ATGTCATGTTTGGGTTTTTGCT  |
| <i>hp0633</i> -qPCR-R | TATACGCTCCTTTAGTGTGGGG  |
| <i>hp1281</i> -qPCR-F | ATGAATGAAGAATCAAAAACGC  |
| <i>hp1281</i> -qPCR-R | CTAAACAAATCCCTAAAATGGG  |
| <i>porA</i> -qPCR-F   | CAGCCTATCCTATCACCCCATC  |
| <i>porA</i> -qPCR-R   | AAACCTCTACCATTAACGCCAA  |
| <i>hp1380</i> -qPCR-F | ATTGGCTTTGACTTTGGGGCTT  |
| <i>hp1380</i> -qPCR-R | AGGGATATTGCGAATGATTTGC  |
| <i>fbcH</i> -qPCR-F   | GGCGTGATTTATTATGGGGTTG  |

---

---

|                       |                           |
|-----------------------|---------------------------|
| <i>fbcH</i> -qPCR-R   | ATAGGGGCTGGAATGTTTTGGG    |
| <i>hp1413</i> -qPCR-F | GACCCCTGAACTAAACCTCAAA    |
| <i>hp1413</i> -qPCR-R | GCGGATAAAAATCACGCCAAAA    |
| <i>hp0510</i> -qPCR-F | ATAGGGTTTTATTTAGAGGGCG    |
| <i>hp0510</i> -qPCR-R | TGATTTTCATATTTTTTAGCGGC   |
| <i>hp0147</i> -qPCR-F | GATTGATGGGATAGGGGAGTTT    |
| <i>hp0147</i> -qPCR-R | CATTGTATTGCCGATTTGAGA     |
| <i>flaG</i> -qPCR-F   | TTATTGAGCGAGCGTCTGAATG    |
| <i>flaG</i> -qPCR-R   | CACGGCTTCTTTAGAGGGTATTTT  |
| <i>flgK</i> -qPCR-F   | GGCTCGTTTGACTTAATCGCTTAC  |
| <i>flgK</i> -qPCR-R   | GGCTTGGATAATATCGTTCATGGT  |
| <i>fliD</i> -qPCR-F   | CTATTTTGGCTCACACCTCCAATC  |
| <i>fliD</i> -qPCR-R   | AAACTCACTTCACTTTTTCCGCTC  |
| <i>motA</i> -qPCR-F   | TCAGTCATCATCATCGTGCCTA    |
| <i>motA</i> -qPCR-R   | CAACACCCCATCTTTTCTAGCC    |
| <i>motB</i> -qPCR-F   | TATCGCTCTTTATGCCATTTTCTAG |
| <i>motB</i> -qPCR-R   | CTCGCCATTTGTTCTTCTTCTTT   |
| <i>hp1082</i> -qPCR-F | TGAATCTGATCTTACGCCTTTATG  |
| <i>hp1082</i> -qPCR-R | TTGAGTGATGCTCTCTATTTTTTG  |
| <i>hp0607</i> -qPCR-F | CTCTGCTTTTTCTGGGACTTCTC   |
| <i>hp0607</i> -qPCR-R | ACGGGCTTTTAGTTTCTGTGATT   |
| <i>sodB</i> -qPCR-F   | GTTGCTCGTTTGAATGATTCA     |
| <i>sodB</i> -qPCR-R   | GACCACTTTGTTTGGCTCTGGT    |

---

Expression of Strep-HP1021

---

|                                 |                                                       |
|---------------------------------|-------------------------------------------------------|
| <i>hp1021</i> <sup>CDS</sup> -F | cccgaattcgagctcggtaccATGAAAATCTTAATCATTGAAG<br>ACGATT |
| <i>hp1021</i> <sup>CDS</sup> -R | gagaccatggtccccctgcagTTATTTGCGCGGTAAGTTATAT<br>TTC    |

---

Electrophoretic mobility shift assay

---



|                            |                                                              |
|----------------------------|--------------------------------------------------------------|
| <i>PureA</i> -F            | CCATTATCACTCCAATTTTAATTCTCA                                  |
| <i>PureA</i> -R            | CTTATTCTCCTATTCTTAAAGTGTTTTTCC                               |
| <i>PureA</i> -AF700-R      | CTTATTCTCCTATTCTTAAAGTGTTTTTCC                               |
| DNase I footprinting assay |                                                              |
| pLB- <i>PureA</i> -F       | AAGAACATCGCTTTTCGATGGCAG                                     |
| pLB- <i>PureA</i> -FAM-R   | CGACTCACTATAGGGAGAGCGTC                                      |
| Site-directed mutagenesis  |                                                              |
| pLB- <i>PureAmt</i> -F     | gcttcgtcagtcgaaacatgtacgtgATTACATCCAACCTTGATTT<br>CGTTAT     |
| pLB- <i>PureAmt</i> -R     | tgtttcgactgacgaagccggctgGAAGCGTTCATTA ACTAATT<br>ATTATTTAAAA |

*The lowercase letters represent overlapping nucleotides.*
