# Supplementary material for: AI-2 Induces Urease Expression Through Downregulation of Orphan Response Regulator HP1021 in Helicobacter pylori
Source: PubMed Central journal article supplement (PMC9010608; doi:10.3389/fmed.2022.790994), 2022-04-01
Supplement: Table_2.pdf [file Table_2.pdf]

**Supplementary Table 2.** Validation of gene expression by qPCR (Wild type/ $\Delta luxS$ ).

| Function                             | Gene name     | log <sub>2</sub> FoldChange<br>(RNAseq) | log <sub>2</sub> FoldChange<br>(qPCR) | Significance |
|--------------------------------------|---------------|-----------------------------------------|---------------------------------------|--------------|
| Aromatic<br>compound<br>biosynthetic | HP1120        | 2.90                                    | 1.89                                  | TRUE         |
|                                      | RpoN (HP0714) | 1.87                                    | 1.22                                  | TRUE         |
|                                      | HP0755        | 1.76                                    | 0.76                                  | TRUE         |
|                                      | PdxA (HP1583) | 1.57                                    | 0.64                                  | TRUE         |
|                                      | HP1582        | 1.55                                    | 0.64                                  | TRUE         |
|                                      | Pgi (HP1166)  | 1.33                                    | 1.56                                  | TRUE         |
|                                      | HP1229        | 1.25                                    | 0.79                                  | TRUE         |
|                                      | HP1036        | 1.24                                    | 0.84                                  | TRUE         |
|                                      | HP0806        | 1.19                                    | 0.58                                  | TRUE         |
|                                      | TrpC (HP1279) | 1.15                                    | 0.10                                  | FALSE        |
|                                      | HP1589        | 1.10                                    | 0.42                                  | TRUE         |
|                                      | HP0483        | 1.08                                    | 0.81                                  | TRUE         |
|                                      | HP0415        | 1.03                                    | 0.58                                  | TRUE         |
|                                      | HP0454        | 1.01                                    | 0.43                                  | FALSE        |
|                                      | HP0264        | 1.01                                    | 1.09                                  | TRUE         |
|                                      | HP0250        | 0.99                                    | 0.12                                  | FALSE        |
|                                      | HP0291        | 0.96                                    | 0.19                                  | FALSE        |
|                                      | HP1231        | 0.88                                    | 0.64                                  | TRUE         |
|                                      | HP0614        | 0.84                                    | 0.36                                  | FALSE        |
|                                      | HP0792        | 0.80                                    | -0.01                                 | FALSE        |
| HrcA (HP0111)                        | 0.79          | 1.03                                    | TRUE                                  |              |
| ThiE (HP0843)                        | 0.76          | 0.71                                    | TRUE                                  |              |
| HemE (HP0604)                        | 0.72          | 0.17                                    | FALSE                                 |              |
| Peptide<br>transport                 | FlgK (HP1119) | 2.77                                    | 1.22                                  | TRUE         |
|                                      | HP1000        | 1.58                                    | 0.74                                  | TRUE         |
|                                      | HP0939        | 1.33                                    | 0.97                                  | TRUE         |
|                                      | HP1283        | 1.09                                    | 0.40                                  | TRUE         |
|                                      | HP0880        | 1.09                                    | 0.49                                  | TRUE         |
|                                      | HP1010        | 1.02                                    | 0.29                                  | TRUE         |
|                                      | HP0454        | 1.01                                    | 0.43                                  | FALSE        |
|                                      | HP0264        | 1.01                                    | 1.09                                  | TRUE         |
|                                      | HP0250        | 0.99                                    | 0.12                                  | FALSE        |
|                                      | FlhB (HP0770) | 0.92                                    | 0.69                                  | TRUE         |
|                                      | FlhA (HP1041) | 0.82                                    | 0.54                                  | FALSE        |
| Amine<br>metabolic<br>process        | UreB (HP0072) | 1.37                                    | 0.74                                  | TRUE         |
|                                      | TrpC (HP1279) | 1.15                                    | 0.10                                  | FALSE        |
|                                      | InfB (HP1048) | 1.07                                    | 1.18                                  | TRUE         |
| Oxidoreduct<br>ase activity          | HP0653        | -2.07                                   | -0.73                                 | TRUE         |
|                                      | FrdB (HP0191) | -1.39                                   | -0.80                                 | TRUE         |

| Function                           | Gene name     | log <sub>2</sub> FoldChange (RNAseq) | log <sub>2</sub> FoldChange (qPCR) | Significance |
|------------------------------------|---------------|--------------------------------------|------------------------------------|--------------|
| Oxidoreductase activity            | HP1461        | -1.29                                | -0.81                              | TRUE         |
|                                    | HP0133        | -1.02                                | -0.90                              | TRUE         |
|                                    | HP0389        | -1.10                                | -0.79                              | TRUE         |
|                                    | HP0096        | -1.04                                | -1.16                              | TRUE         |
|                                    | HP1295        | -0.95                                | -0.79                              | TRUE         |
|                                    | HP0633        | -0.94                                | -0.51                              | TRUE         |
|                                    | PorA (HP1110) | -0.82                                | -0.56                              | TRUE         |
|                                    | HP1380        | -0.80                                | -1.16                              | TRUE         |
|                                    | FbcH (HP1538) | -0.74                                | -0.43                              | TRUE         |
|                                    | HP1413        | -0.73                                | -0.81                              | TRUE         |
|                                    | HP0510        | -0.72                                | -0.44                              | TRUE         |
|                                    | HP0147        | -0.71                                | 0.01                               | FALSE        |
| Drug metabolic process             | HP0653        | -2.07                                | -0.73                              | TRUE         |
|                                    | TrmE (HP1452) | -1.37                                | -0.62                              | TRUE         |
|                                    | AtpC (HP1131) | -1.30                                | -1.46                              | TRUE         |
|                                    | HP1132        | -0.96                                | -1.39                              | TRUE         |
|                                    | HP1281        | -0.91                                | -1.19                              | TRUE         |
| Alpha-amino acid metabolic process | HP0653        | -2.07                                | -0.73                              | TRUE         |
|                                    | HP0013        | -1.02                                | -0.90                              | TRUE         |
|                                    | HP1281        | -0.91                                | -1.19                              | TRUE         |
|                                    | HP1380        | -0.80                                | -1.16                              | TRUE         |
|                                    | HP0510        | -0.72                                | -0.44                              | TRUE         |
| ATP metabolic process              | TrmE (HP1452) | -1.37                                | -0.62                              | TRUE         |
|                                    | AtpC (HP1131) | -1.30                                | -1.46                              | TRUE         |
|                                    | HP1132        | -0.96                                | -1.39                              | TRUE         |
| Flagellar related genes            | FlgL (HP0295) | 1.07                                 | 0.74                               | TRUE         |
|                                    | FliS (HP0753) | 1.30                                 | 1.18                               | TRUE         |
|                                    | FlaG (HP0751) | 2.37                                 | 1.15                               | TRUE         |
|                                    | FlgK (HP1119) | 2.77                                 | 1.22                               | TRUE         |
|                                    | FliD (HP0752) | 2.35                                 | 0.97                               | TRUE         |
|                                    | MotA (HP0815) | 1.22                                 | 0.74                               | TRUE         |
|                                    | MotB (HP0816) | 1.35                                 | 0.76                               | TRUE         |
| Iron related cellular activity     | HP0631        | -1.16                                | -1.27                              | TRUE         |
|                                    | HP0632        | -1.04                                | -1.55                              | TRUE         |
|                                    | HP0635        | -1.04                                | -0.74                              | TRUE         |
|                                    | SodB (HP0389) | -1.10                                | -0.91                              | TRUE         |
| Multidrug efflux pump              | HP1082        | 1.54                                 | 0.89                               | TRUE         |
|                                    | HP0607        | 1.31                                 | 1.40                               | TRUE         |

Student's *t*-test was used to evaluate the statistical significance. True represents statistically significant with *p* value < 0.05, False represents statistically non-significant.
