# Supplementary material for: AI-2 Induces Urease Expression Through Downregulation of Orphan Response Regulator HP1021 in Helicobacter pylori
Source: PubMed Central journal article supplement (PMC9010608; doi:10.3389/fmed.2022.790994), 2022-04-01
Supplement: Table_3.pdf [file Table_3.pdf]

**Supplementary Table 3.** Differential expression of transcriptional regulators identified by RNAseq.

| <b>Gene ID</b> | <b>Log<sub>2</sub>FoldChange</b><br><b>(<i>ΔluxS</i>/Wild type)</b> | <b>Significance</b> |
|----------------|---------------------------------------------------------------------|---------------------|
| HP1021         | -1.4661                                                             | TRUE                |
| Fur(HP1027)    | -0.8380                                                             | TRUE                |
| HP0564         | -0.8293                                                             | TRUE                |
| CheY(HP1067)   | -0.3501                                                             | FALSE               |
| HP0222         | -0.2007                                                             | FALSE               |
| FlgR(HP0703)   | -0.1540                                                             | FALSE               |
| FliA(HP1032)   | -0.1357                                                             | FALSE               |
| CrdR(HP1365)   | -0.0988                                                             | FALSE               |
| RpoD(HP0088)   | -0.0968                                                             | FALSE               |
| NikR(HP1338)   | -0.0105                                                             | FALSE               |
| ArsR(HP0166)   | 0.1556                                                              | FALSE               |
| Hup(HP0835)    | 0.1783                                                              | FALSE               |
| HsrA(HP1043)   | 0.2946                                                              | FALSE               |
| HspR(HP1025)   | 0.6418                                                              | FALSE               |
| HrcA(HP0111)   | 0.7870                                                              | TRUE                |
| RpoN(HP0714)   | 1.8690                                                              | TRUE                |

True represents statistically significant with  $p$  value  $< 0.05$ , false represents statistically non-significant.
